# Supplementary material for: Molten-salt-assisted preparation of porous carbon foams for efficient oxygen electrocatalysis in zinc–air batteries
Source: Royal Society of Chemistry journal article supplement (doi:10.1039/d4cc01793e), 2024-01-01
Supplement: d4cc01793e1.pdf [file d4cc01793e1.pdf]

## Electronic Supplementary Information

### **Molten-salt-assisted preparation of porous carbon foams for efficient oxygen electrocatalysis**

Jizhen Ma, Xinxin Shu, Song Chen, Qianwu Chen, An-Liang Wang, Jintao Zhang\*

Key Laboratory for Colloid and Interface Chemistry, Ministry of Education, School of Chemistry and Chemical Engineering, Shandong University, Jinan 250100, PR China.

\*Corresponding author: E-mail: [jtzhang@sdu.edu.cn](mailto:jtzhang@sdu.edu.cn) (Jintao Zhang)

## Experiments

### 1. Preparation of three-dimensional macro–microporous carbon foams

1.25 g of starch was dissolved in 10 mL of deionized (DI) water under stirring, and then 10 g of potassium chloride was added to the above solution, subsequently. After adding 3 mmol  $\text{CoCl}_2$ ,  $\text{NiCl}_2$ , respectively, the mixed solution kept overnight under stirring and freeze-dried to produce precursors. The precursors were thermally treated at 700, °C for 1 h in inert atmosphere. The obtained samples were washed with diluted acid and then vacuum-dried at 60 °C. The final product was obtained by further calcined at a temperature of 700, 800, and 900 °C in  $\text{NH}_3$  atmosphere for 3 h and named as MCF-Co-700, MCF-Co-800, MCF-Co-900, MCF-Co<sub>1</sub>Ni<sub>2</sub>-800 MCF-Co<sub>2</sub>Ni<sub>1</sub>-800 with changing mole ratio, respectively.

### 2.2 Characterization

Scanning electron microscopy (SEM, JEOL JSM-6510LV, Japan) was performed to characterize the morphology of samples. X-ray photoelectron spectroscopic (XPS) measurements were tested on a VG Microtech ESCA 2000 (UK) using a monochromic Al X-ray source (97.9 W, 93.9 eV). The microstructure of the sample was characterized by HRTEM with Tecnai G2 F30 S-TWIN. For the electrochemical measurements, the homogeneous catalyst ink was prepared by dispersing 5 mg of electrocatalysts into an aqueous solution containing 950  $\mu\text{L}$  DI water and 50  $\mu\text{L}$  of 5 wt% Nafion under sonication. The working electrode was prepared by dropping 8  $\mu\text{L}$  of the catalyst ink onto a mirror polished glassy carbon electrode. The electrolyte is 0.1

M KOH aqueous solution. The air electrode was prepared by coating the catalyst ink on a piece of carbon paper (catalyst loading  $0.5 \text{ mg cm}^{-2}$ ), which is coupled with a Zn plate for fabricating a Zn-air battery in 6 M KOH electrolyte..

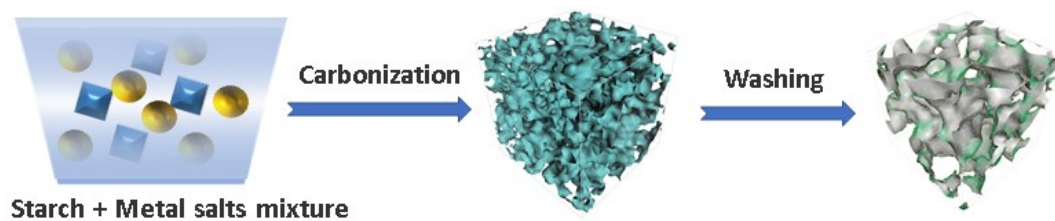

**Fig. S1.** Scheme illustration for the preparation of porous carbon foams.

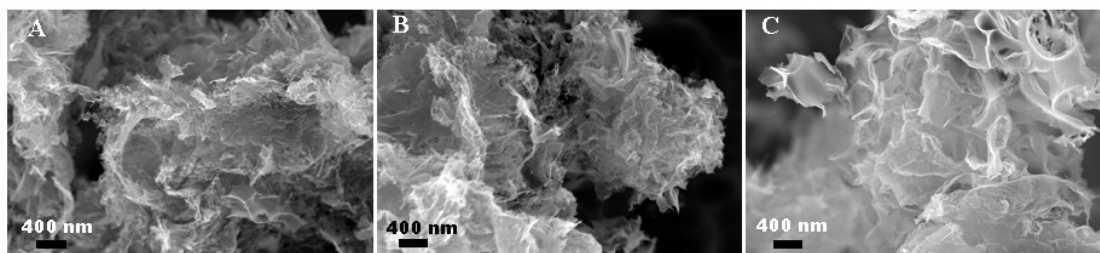

**Fig. S2.** SEM images of the samples prepared at 700, 800, 900 °C.

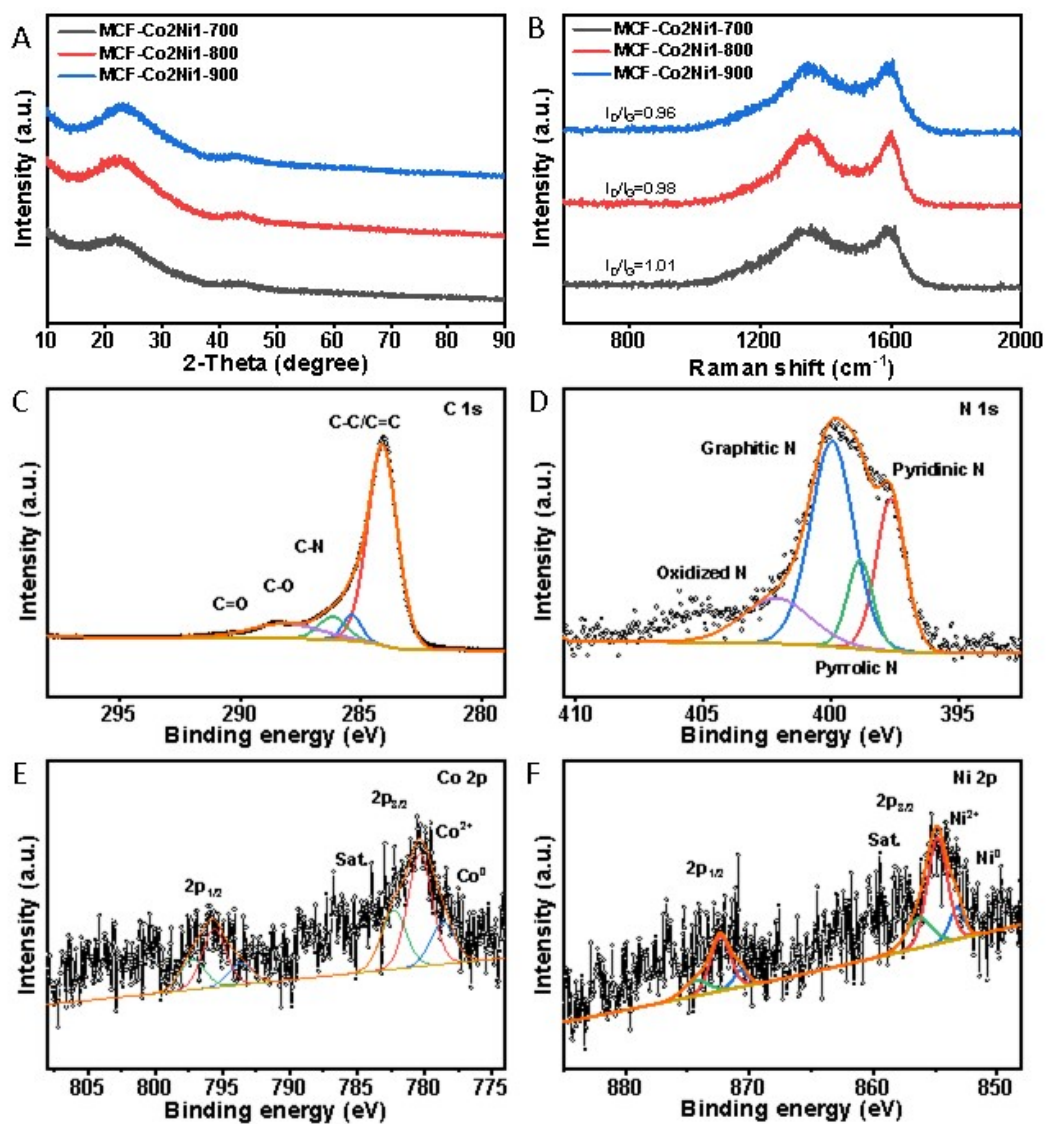

Fig. S3 XRD patterns (A), Raman spectra (B), and XPS spectra of MCF-Co<sub>2</sub>Ni<sub>1-800</sub> for C1s (C), N1s (D), Co2p (E) and Ni2p (F).

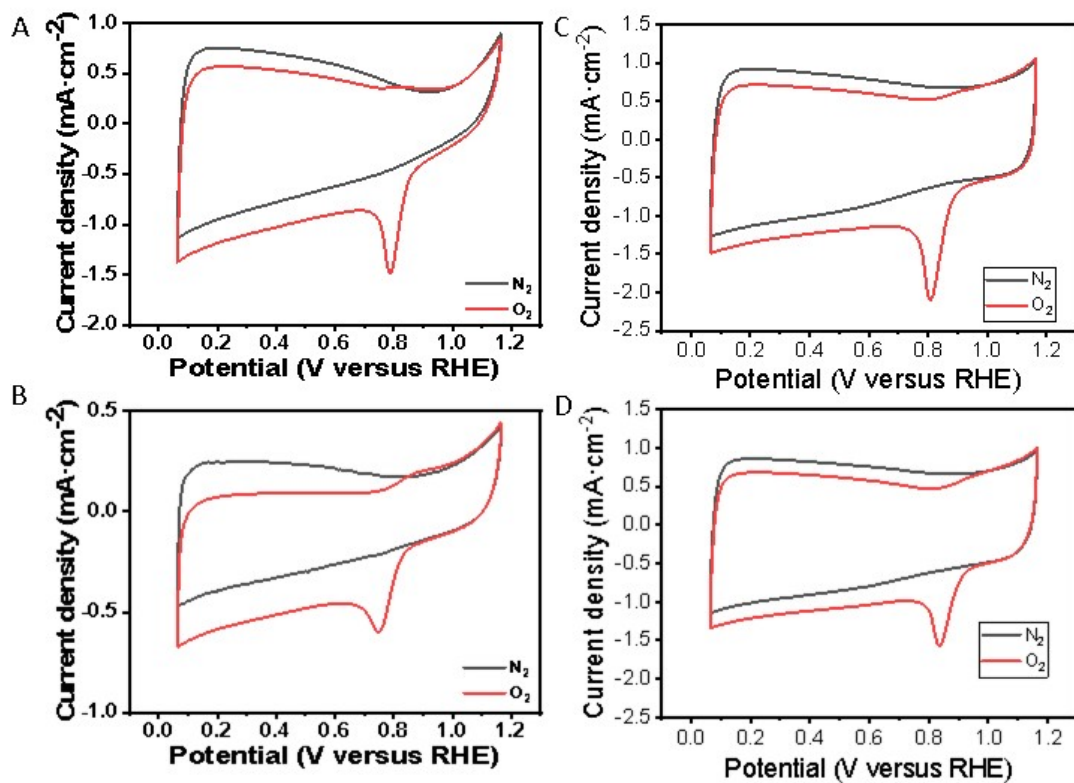

**Fig. S4.** The CV curves of MCF-Co-800 (A), MCF-Ni-800 (B), MCF-Co<sub>1</sub>Ni<sub>2</sub>-800 (C), MCF-Co<sub>2</sub>Ni<sub>1</sub>-800 (D) in nitrogen and oxygen-saturated electrolytes, respectively.

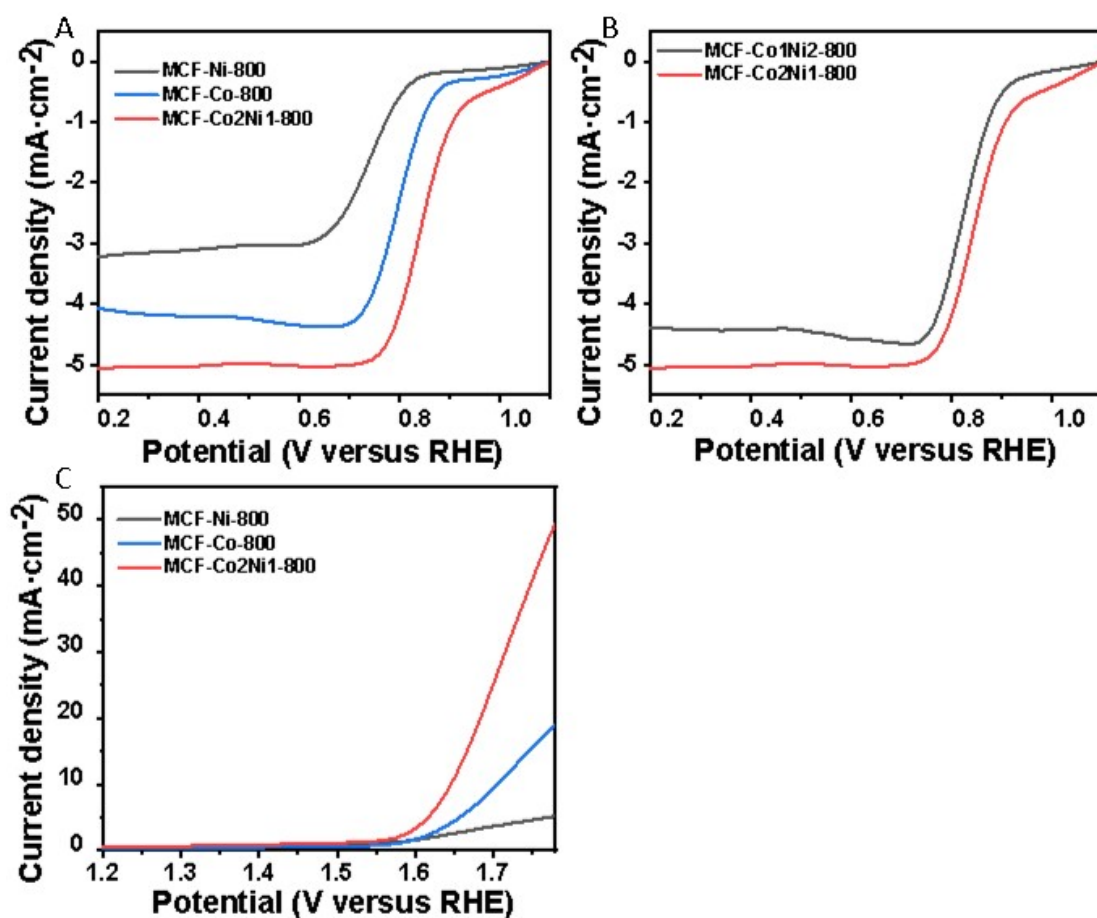

Fig. S5. (A) Polarization profile of oxygen reduction at a rotating speed of 1600 rpm and (B) Polarization profile of oxygen evolution reaction. (C) Polarization profile of oxygen reduction at MCF-Co1Ni2-800 and MCF-Co2Ni1-800.



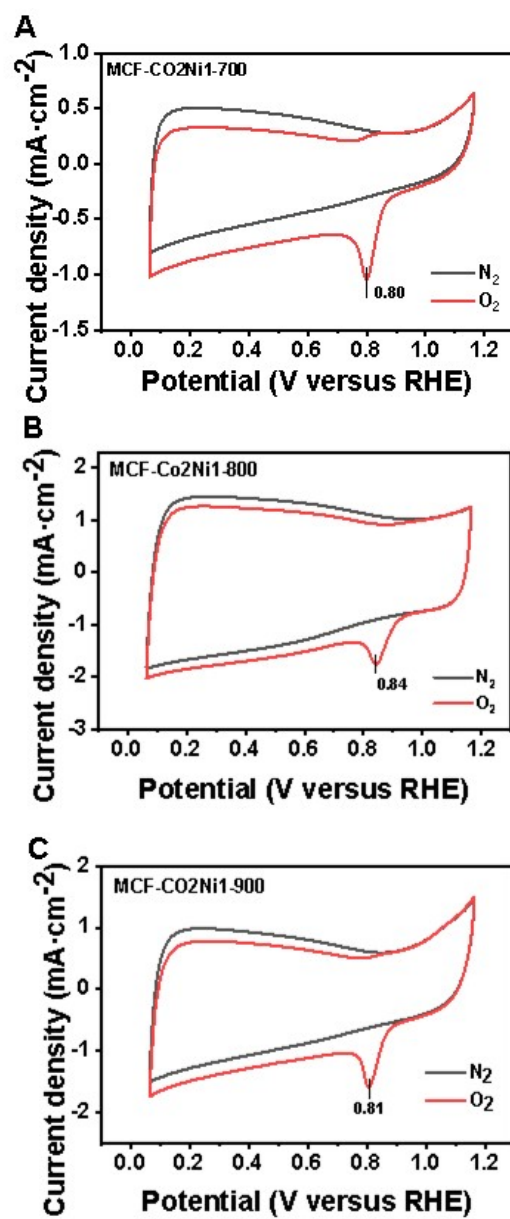

**Fig. S6.** The CV curves for oxygen reduction reaction at the MCF-Co2Ni1-700 (A), MCF-Co2Ni1-800 (B), MCF-Co2Ni1-900 (C) electrodes in nitrogen and oxygen-saturated electrolytes, respectively.

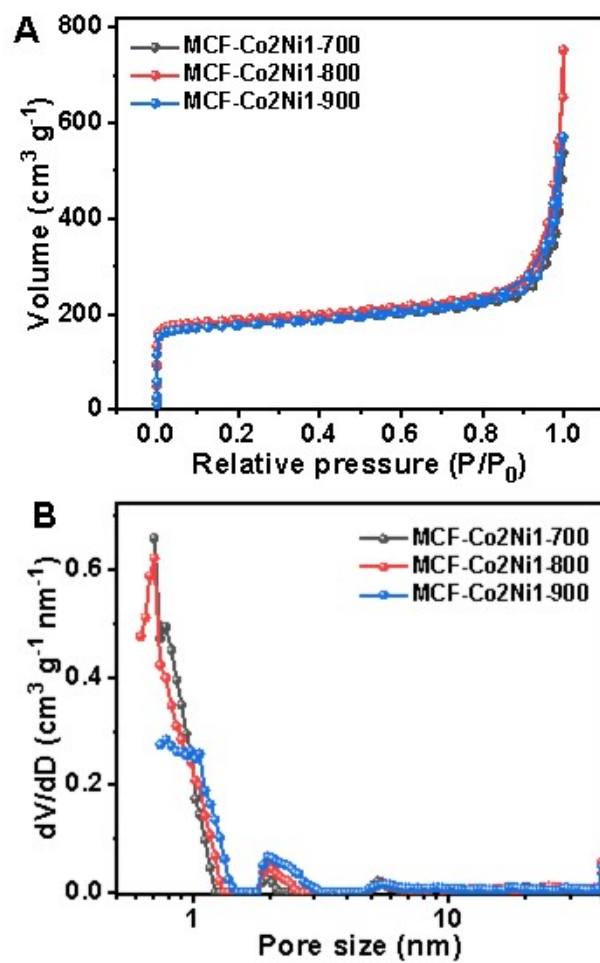

**Fig. S7.** The nitrogen adsorption-desorption isotherms (A) and the corresponding pore size distribution curves (B).

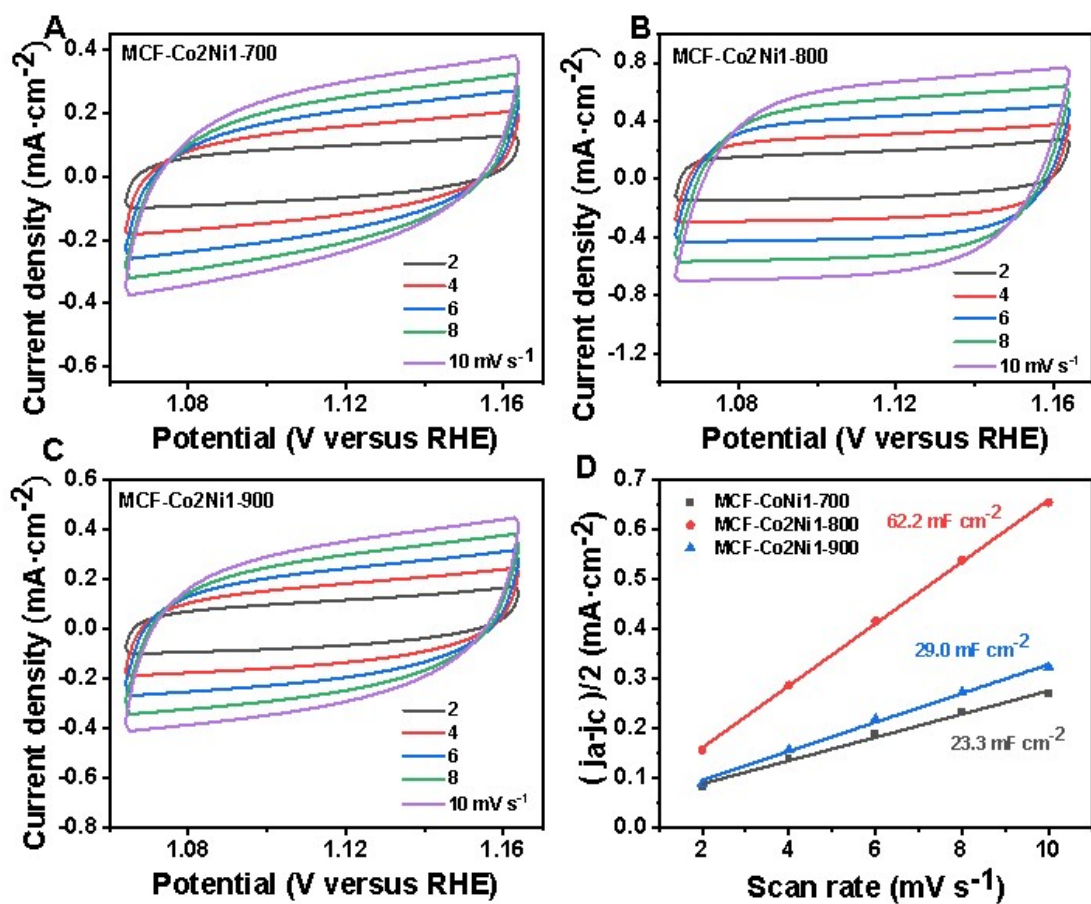

Fig. S8. The CV curves at the changing scan rates (A-C) and the fitting curves (D).

**Table S1.** EXAFS fitting results of MCF-Co<sub>2</sub>Ni<sub>1</sub>-800 and Ni foil,  $S_0^2 = 0.7$ .

| <b>Sample</b>                        | <b>Shell</b> | <b>CN</b> | <b>R(Å)</b> | <b><math>\sigma^2</math></b> | <b><math>\Delta E_0</math></b> | <b>R factor</b> |
|--------------------------------------|--------------|-----------|-------------|------------------------------|--------------------------------|-----------------|
| Ni foil                              | Ni-Ni        | 12        | 2.48        | 0.006                        | 0.68±0.03                      | 0.002           |
| MCF-                                 | Ni-N         | 3.9       | 2.08±0.01   | 0.005                        |                                |                 |
| Co <sub>2</sub> Ni <sub>1</sub> -800 | Ni-Ni        | 2.3       | 3.07±0.03   | 0.01                         | 1.66±1.07                      | 0.008           |

**Table S2.** EXAFS fitting results of MCF-Co<sub>2</sub>Ni<sub>1</sub>-800 and Ni foil,  $S_0^2 = 0.7$ .

| <b>Sample</b>                        | <b>Shell</b> | <b>CN</b> | <b>R(Å)</b> | <b><math>\sigma^2</math></b> | <b><math>\Delta E_0</math></b> | <b>R factor</b> |
|--------------------------------------|--------------|-----------|-------------|------------------------------|--------------------------------|-----------------|
| Co foil                              | Co-Co        | 12        | 2.49        | 0.008                        | -6.49±0.71                     | 0.005           |
| MCF-                                 | Co-N         | 1.7       | 1.46±0.01   | 0.001                        |                                |                 |
| Co <sub>2</sub> Ni <sub>1</sub> -800 | Co-N         | 2.8       | 1.72±0.01   | 0.005                        | -7.9±3.5                       | 0.016           |
|                                      | Co-Co        | 1.1       | 2.25±0.01   | 0.004                        |                                |                 |

**Table S3.** Comparison of Zn-air batteries performance of this work with other art-of-state non-noble metal catalysts.

| Catalysts                                                  | Open circuit potential (V) | Peak power density (mW cm <sup>-2</sup> ) | Cycling stability              | Ref.      |
|------------------------------------------------------------|----------------------------|-------------------------------------------|--------------------------------|-----------|
| <b>MCF-Co<sub>2</sub>Ni-800</b>                            | 1.48                       | 208                                       | 485 h @ 5 mA cm <sup>-2</sup>  | This work |
| <b>FeCo-SAs</b>                                            | 1.48                       | 203                                       | 550 h @10 mA cm <sup>-2</sup>  | [1]       |
| <b>Fe<sub>2</sub>NiO<sub>4</sub>/FeNiS<sub>2</sub> MTs</b> | 1.47                       | 144.2                                     | 1000 h @2 mA cm <sup>-2</sup>  | [2]       |
| <b>FeCo/Se-CNT</b>                                         | 1.54                       | 173.4                                     | 70 h @5 mA cm <sup>-2</sup>    | [3]       |
| <b>MnSs@NGA</b>                                            | 1.52                       | 115.0                                     | N/A                            | [4]       |
| <b>CoFe-N-C DAC</b>                                        | 1.49                       | 142                                       | 200 h @5 mA cm <sup>-2</sup>   | [5]       |
| <b>Co<sub>3</sub>O<sub>4</sub>/Co@NCs</b>                  | 1.50                       | 123.5                                     | 600 h @10 mA cm <sup>-2</sup>  | [6]       |
| <b>CoS<sub>1-δ</sub>/SnS<sub>2-δ</sub></b>                 | 1.54                       | 249                                       | 168 h @20 mA cm <sup>-2</sup>  | [7]       |
| <b>RuFe-N-C</b>                                            | 1.52                       | 139.9                                     | 200 h @ 5 mA cm <sup>-2</sup>  | [8]       |
| <b>PCACoCN-1</b>                                           | 1.47                       | 130                                       | 170 h @ 10 mA cm <sup>-2</sup> | [9]       |
| <b>VC-MOF-Fe</b>                                           | 1.49                       | 113                                       | 26 h                           | [10]      |
| <b>Co@NPCP/NB-CNF-2-800</b>                                | 1.48                       | 143.8                                     | 110 h @10 mA cm <sup>-2</sup>  | [11]      |
| <b>0.05CoO<sub>x</sub>@PNC</b>                             | 1.49                       | 157.1                                     | 110 h@10 mA cm <sup>-2</sup>   | [12]      |
| <b>MnO/Co/PGC</b>                                          | 1.52                       | 172                                       | 350 cycles                     | [13]      |
| <b>Fe-2-WNPC-NCNTs</b>                                     | 1.43                       | 101.3                                     | 66 h @ 2 mA cm <sup>-2</sup>   | [14]      |
| <b>Co@hNCTs-800</b>                                        | 1.45                       | 149                                       | 50 h @ 5 mA cm <sup>-2</sup>   | [15]      |
| <b>NC@Co-HPNC</b>                                          | NA                         | 165                                       | 230 h @ 5 mA cm <sup>-2</sup>  | [16]      |

## Reference

- [1] Z. Li, X. Zhong, L. Gao, J. Hu, W. Peng, X. Wang, G. Zhou, B. Xu, *ACS Nano* **2024**, *18*, 13006-13018.
- [2] X. Li, D. C. Nguyen, K. Dong, S. Prabhakaran, D. T. Tran, D. H. Kim, N. H. Kim, J. H. Le, *Chem. Eng. J.* **2024**, *489*, 151210.
- [3] H. Zhang, M. Zhao, H. Liu, S. Shi, Z. Wang, B. Zhang, L. Song, J. Shang, Y. Yang, C. Ma, L. Zheng, Y. Han, W. Huang, *Nano Lett.* **2021**, *21*, 2255.
- [4] H. Zhao, R. Jiang, Y. Zhang, B. Xie, J. Fu, X. Yuan, W. Yang, Y. Wu, R. Zhang, *J. Mater. Chem. A* **2021**, *9*, 5848.
- [5] X. Zhou, J. Gao, Y. Hu, Z. Jin, K. Hu, K. M. Reddy, Q. Yuan, X. Lin, H.-J. Qiu, *Nano Letters* **2022**, *22*, 3392-3399.
- [6] N.-F. Yu, C. Wu, W. Huang, Y.-H. Chen, D.-Q. Ruan, K.-L. Bao, H. Chen, Y. Zhang, Y. Zhu, Q.-H. Huang, W.-H. Lai, Y.-X. Wang, H.-G. Liao, S.-G. Sun, Y.-P. Wu, J. Wang, *Nano Energy* **2020**, *77*, 105200.
- [7] N. K. Wagh, D.-H. Kim, C. H. Lee, S.-H. Kim, H.-D. Um, J. S.-I. Kwon, S. S. Shinde, S. U. Lee, J.-H. Lee, *Nanoscale Horizons* **2023**, *8*, 921-934.
- [8] X. Zhou, S. Chu, Z. Jin, K. Hu, P. Liu, H.-J. Qiu, X. Lin, *ACS Mater. Letters* **2023**, *5*, 1656-1664.
- [9] J.H. Park, C.H. Lee, J.-M. Ju, J.-H. Lee, D. Yim, C. Choi, P.V. Braun, S.U. Lee, J.-H. Kim, *Appl. Catal. B Environ.* **2020**, *270*, 118869.
- [10] C. Hu, H. Jin, B. Liu, L. Liang, Z. Wang, D. Chen, D. He, S. Mu, *Nano Energy* **2021**, *82*, 105714.
- [11] C. Gu, J. Li, J.-P. Liu, H. Wang, Y. Peng, C.-S. Liu, *Appl. Catal. B Environ.* **2021**, *286*, 119888.
- [12] Y. Tan, W. Zhu, Z. Zhang, W. Wu, R. Chen, S. Mu, H. Lv, N. Cheng, *Nano Energy* **2021**, *83*, 105813.
- [13] X.F. Lu, Y. Chen, S. Wang, S. Gao, X.W.D. Lou, *Adv Mater* **2019**, *31*, e1902339.
- [14] Z. Liu, Y. Zhu, K. Xiao, Y. Xu, Y. Peng, J. Liu, X. Chen, *ACS Appl. Mater. Interfaces* **2021**, *13*, 24710.
- [15] Q. Zhou, Z. Zhang, J. Cai, B. Liu, Y. Zhang, X. Gong, X. Sui, A. Yu, L. Zhao, Z. Wang, Z. Chen, *Nano Energy* **2020**, *71*, 104592.
- [16] Z. Chi, Y. Feng, Y. Ma, D. Kong, H. Yin, S. Li, L. Li, Z. Guo, L. Wang, *Chem. Commun.* **2021**, *57*, 11248-11251.
